# Supplementary material
Source: publisher figshare collection journal article supplement (https://acs.figshare.com/ndownloader/files/9197821)
Supplement: Supplementary file 1 [file 9197821]

## Supporting Information

### Magnetically Aligned Co-C/MWCNTs Composite Derived from MWCNTs Interconnected Zeolitic Imidazolate Frameworks for Lightweight and Highly Efficient Electromagnetic Wave Absorber

*Yichao Yin,<sup>†</sup> Xiaofang Liu,<sup>\*,†</sup> Xiaojun Wei,<sup>‡</sup> Ya Li,<sup>†</sup> Xiaoyu Nie,<sup>†</sup> Ronghai Yu,<sup>\*,†</sup> Jianglan Shui<sup>†</sup>*

<sup>†</sup> School of Materials Science and Engineering, Beihang University, Beijing 100191, China

<sup>‡</sup> Institute of Chemistry, Chinese Academy of Sciences, Beijing 100190, China

#### Corresponding Authors

\*E-mail: [liuxf05@buaa.edu.cn](mailto:liuxf05@buaa.edu.cn).

\*E-mail: [rhyu@buaa.edu.cn](mailto:rhyu@buaa.edu.cn)

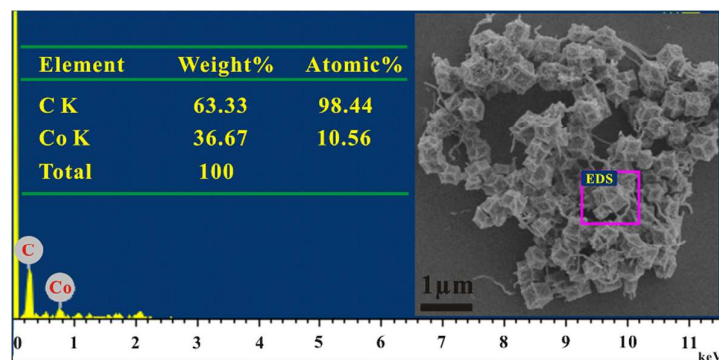

**Figure S1.** SEM image and EDS result of Co-C/MWCNTs composite.

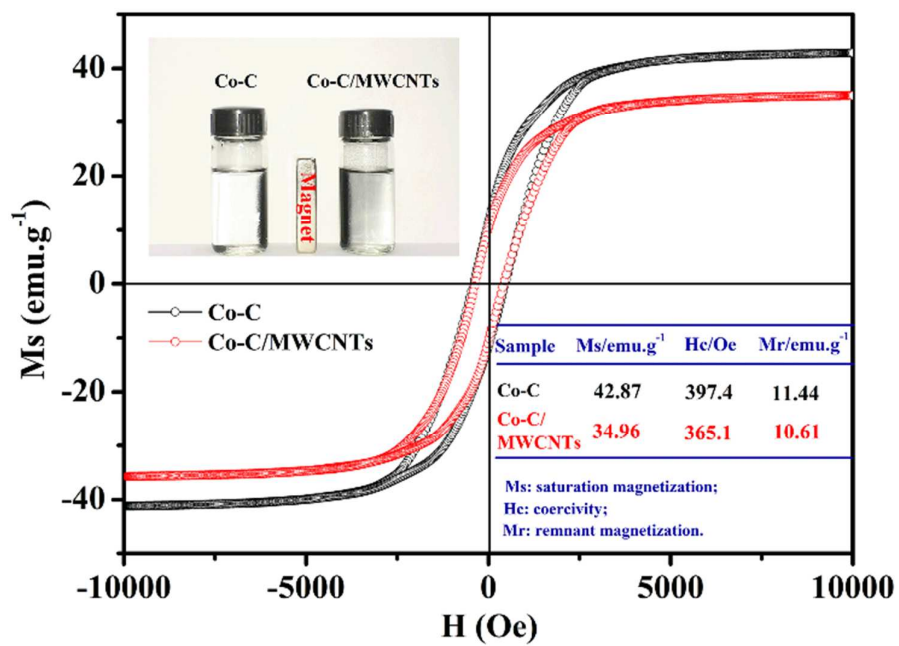

**Figure S2.** Room-temperature magnetization curves of Co-C and Co-C/MWCNTs composites. Inset: photograph of magnetic separation for Co-C and Co-C/MWCNTs composites.

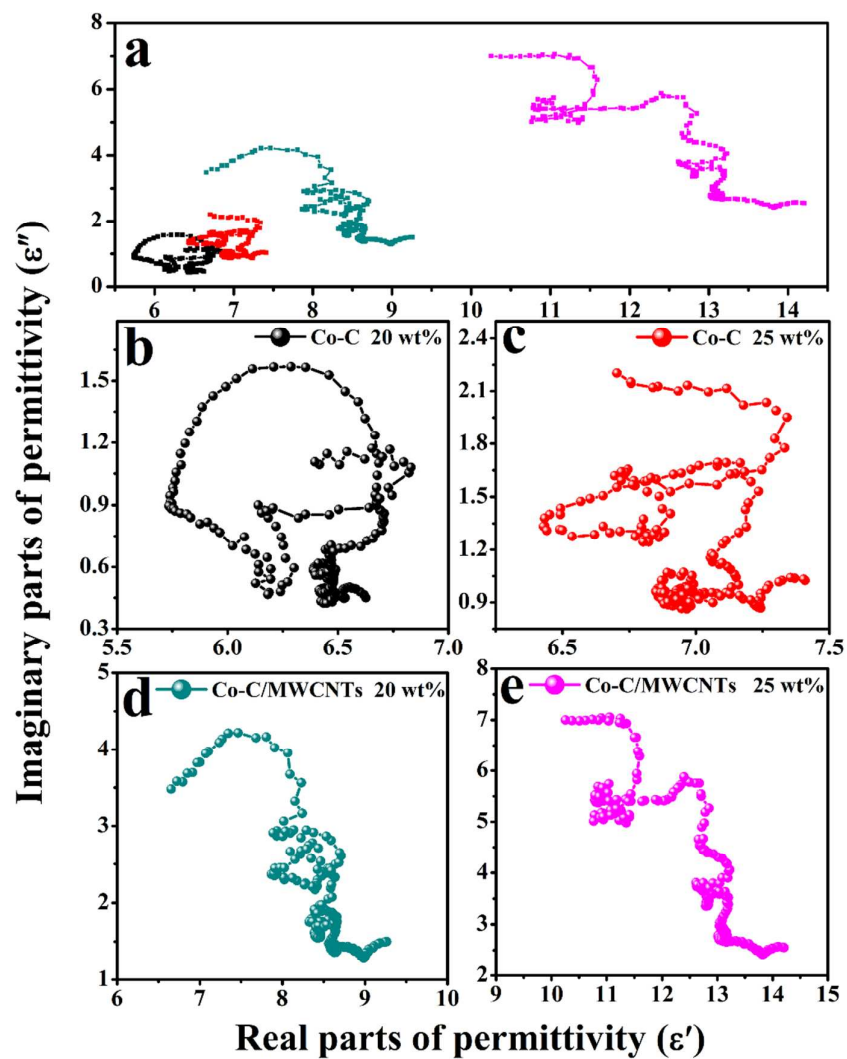

**Figure S3.** (a) Comparison of  $\epsilon'$ – $\epsilon''$  plots for Co-C and Co-C/MWCNTs composites.

Enlarged  $\epsilon'$ – $\epsilon''$  plots for (b) Co-C (20 wt%), (c) Co-C (25 wt%), (d) Co-C/MWCNTs (20 wt%), and (e) Co-C/MWCNTs (25 wt%).

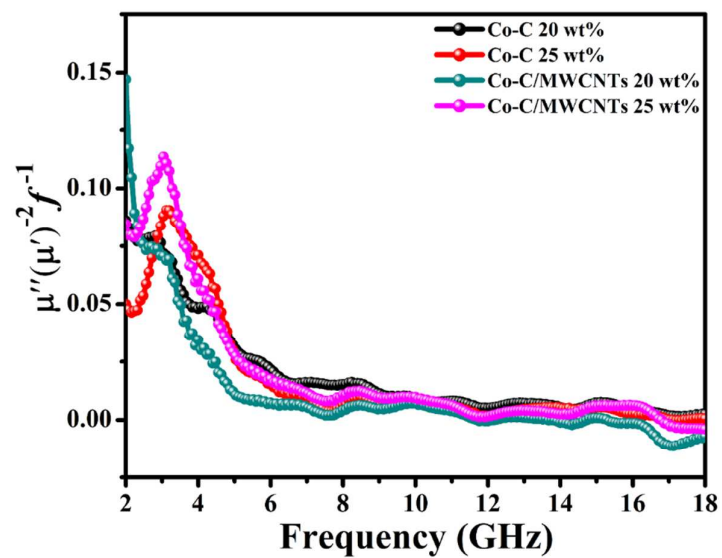

**Figure S4.** Frequency dependences of  $\mu''(\mu')^{-2}f^1$  values for Co-C and Co-C/MWCNTs composites in 2–18 GHz.

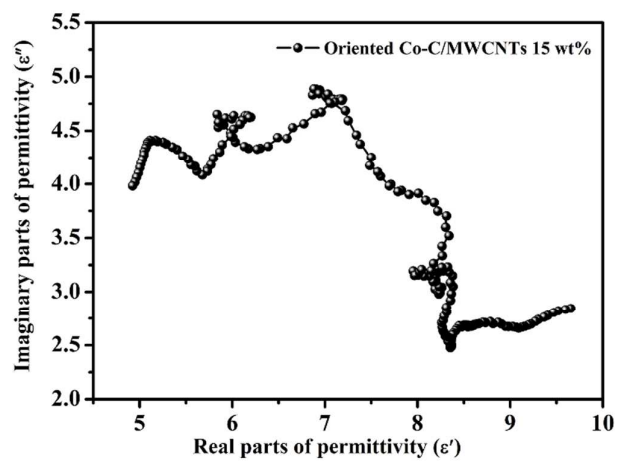

**Figure S5.**  $\epsilon'$ - $\epsilon''$  plot of oriented Co-C/MWCNTs composite (15 wt%).

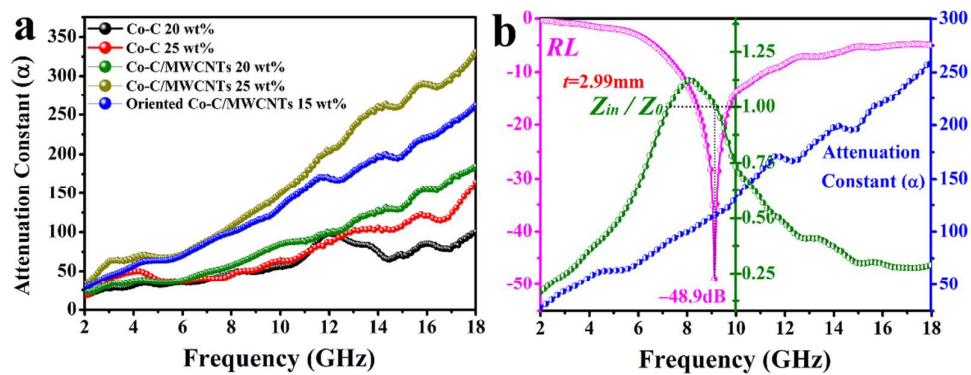

**Figure S6.** Frequency dependences of (a) attenuation constant for all samples and (b) optimum RL value, relative input impedance ( $|Z_{in}/Z_0|$ ), attenuation constant of oriented Co-C/MWCNTs composites (15 wt%).

**Table S1.** Comparison of EMW absorbing properties of various MOF-derived composite absorbers.

| Sample                                 | Filler loading (wt%) | Matching thickness (mm) | Matching frequency (GHz) | Minimum RL value (dB) | Ref.      |
|----------------------------------------|----------------------|-------------------------|--------------------------|-----------------------|-----------|
| Fe-Co/ <sup>a</sup> NPC                | 50                   | 1.2                     | ~15                      | -21.7                 | [67]      |
| Fe/C                                   | 40                   | 2.0                     | 15.0                     | -22.6                 | [26]      |
| ZnO/NPC@Co/NPC                         | 50                   | 1.9                     | ~16                      | -28.8                 | [68]      |
| NiO/Ni/GN@Air@NiO/Ni/GN                | 50                   | 1.7                     | 17.2                     | -34.5                 | [74]      |
| CoFe@C                                 | 50                   | 2.5                     | 9.92                     | -43.5                 | [71]      |
| Co/C- <sup>b</sup> 500                 | 40                   | 2.5                     | 5.8                      | -35.3                 | [25]      |
| <sup>c</sup> CNCo                      | 50                   | 1.65                    | 3.36                     | -51                   | [73]      |
| C-ZIF-67@TiO <sub>2</sub>              | 50                   | 1.65                    | 13.8                     | -51.7                 | [13]      |
| CuO@NPC                                | 50                   | 1.55                    | 14.9                     | -57.5                 | [69]      |
| Co/NPC@Void@ <sup>d</sup> CI           | 40                   | 2.2                     | 13.68                    | -49.2                 | [27]      |
| Co/C- <sup>e</sup> 800                 | 30                   | 2.55                    | 9.60                     | -39.6                 | [31]      |
| <sup>f</sup> MOF (Fe)/PANI             | 30                   | 2.0                     | 11.6                     | -41.4                 | [70]      |
| Co <sub>3</sub> O <sub>4</sub> /Co/RGO | 20                   | 2.0                     | 13.12                    | -52.8                 | [72]      |
| CNTs/Co                                | 20                   | 1.81                    | 15.04                    | -60.4                 | [53]      |
| Co-C/MWCNTs                            | 15                   | 2.99                    | 9.12                     | -48.9                 | This work |

<sup>a</sup>NPC: nanoporous carbon composite, <sup>b</sup>500: calcined at 500 °C, <sup>c</sup>CN: carbon-nanopolyhedron, <sup>d</sup>CI: carbonyl iron, <sup>e</sup>800: calcined at 800 °C, <sup>f</sup>MOF (Fe): Fe-based MOF.
